# Supplementary material for: Fully automatic evaluation of the corneal endothelium from in vivo confocal microscopy
Source: Springer Nature journal article supplement (doi:10.1186/s12880-015-0054-3), 2015-04-25
Supplement: MOESM1 [file 9740966]

**Table S1** Values of manual and automatic estimates of endothelial parameters for each of the images in our data set. We include the automatic estimates from the NAVIS software and from the segmentation algorithm proposed in this paper.

| image size  |             | ground truth |                                 |                      |                     | NAVIS                           |                      |                     |                                 | proposed method      |                     |                                 |                      |                     |              |
|-------------|-------------|--------------|---------------------------------|----------------------|---------------------|---------------------------------|----------------------|---------------------|---------------------------------|----------------------|---------------------|---------------------------------|----------------------|---------------------|--------------|
| $x$<br>(px) | $y$<br>(px) | cells        | density<br>( $\text{mm}^{-2}$ ) | polymegathism<br>(%) | pleomorphism<br>(%) | density<br>( $\text{mm}^{-2}$ ) | polymegathism<br>(%) | pleomorphism<br>(%) | density<br>( $\text{mm}^{-2}$ ) | polymegathism<br>(%) | pleomorphism<br>(%) | density<br>( $\text{mm}^{-2}$ ) | polymegathism<br>(%) | pleomorphism<br>(%) | $F$ -measure |
| 378         | 476         | 65           | 1541                            | 33.3                 | 56.9                | 1634                            | 29.3                 | 56.5                | 1553                            | 27.6                 | 52.3                | 1553                            | 27.6                 | 52.3                | 0.99         |
| 491         | 416         | 71           | 1396                            | 25.8                 | 66.2                | 1523                            | 36.7                 | 50.0                | 1368                            | 27.0                 | 55.2                | 1368                            | 27.0                 | 55.2                | 0.93         |
| 353         | 354         | 52           | 1760                            | 43.2                 | 40.4                | 1949                            | 42.2                 | 43.1                | 1831                            | 41.6                 | 30.2                | 1831                            | 41.6                 | 30.2                | 0.94         |
| 390         | 553         | 85           | 1799                            | 30.0                 | 44.7                | 1862                            | 31.5                 | 36.5                | 1845                            | 29.7                 | 41.1                | 1845                            | 29.7                 | 41.1                | 0.92         |
| 351         | 415         | 78           | 2152                            | 23.9                 | 57.7                | 2196                            | 26.6                 | 57.0                | 2169                            | 23.8                 | 58.1                | 2169                            | 23.8                 | 58.1                | 0.98         |
| 349         | 456         | 91           | 2215                            | 27.5                 | 62.6                | 2193                            | 29.1                 | 64.0                | 2367                            | 30.9                 | 54.3                | 2367                            | 30.9                 | 54.3                | 0.91         |
| 411         | 448         | 97           | 2285                            | 35.0                 | 41.2                | 2359                            | 36.0                 | 36.4                | 2174                            | 38.7                 | 40.2                | 2174                            | 38.7                 | 40.2                | 0.86         |
| 538         | 476         | 59           | 958                             | 16.8                 | 59.3                | 1890                            | 67.7                 | 22.5                | 1014                            | 38.1                 | 40.4                | 1014                            | 38.1                 | 40.4                | 0.85         |
| 561         | 553         | 63           | 883                             | 18.1                 | 69.8                | 2059                            | 64.4                 | 35.7                | 897                             | 25.0                 | 62.1                | 897                             | 25.0                 | 62.1                | 0.90         |
| 491         | 516         | 53           | 848                             | 22.0                 | 58.5                | 2222                            | 67.3                 | 29.5                | 830                             | 24.9                 | 64.7                | 830                             | 24.9                 | 64.7                | 0.91         |
| 420         | 466         | 83           | 1760                            | 28.4                 | 62.7                | 1974                            | 38.9                 | 44.2                | 1870                            | 33.1                 | 52.3                | 1870                            | 33.1                 | 52.3                | 0.95         |
| 403         | 525         | 65           | 1204                            | 29.0                 | 53.8                | 1668                            | 47.1                 | 34.2                | 1274                            | 33.8                 | 42.6                | 1274                            | 33.8                 | 42.6                | 0.89         |
| 346         | 475         | 123          | 3033                            | 34.5                 | 45.5                | 3073                            | 37.4                 | 39.5                | 3094                            | 31.0                 | 43.0                | 3094                            | 31.0                 | 43.0                | 0.92         |
| 351         | 476         | 84           | 2068                            | 34.9                 | 52.4                | 2230                            | 35.0                 | 49.5                | 2064                            | 32.1                 | 49.4                | 2064                            | 32.1                 | 49.4                | 0.97         |
| 408         | 463         | 64           | 1481                            | 30.9                 | 40.6                | 1441                            | 36.4                 | 33.3                | 1531                            | 26.5                 | 41.2                | 1531                            | 26.5                 | 41.2                | 0.95         |
| 431         | 476         | 74           | 1485                            | 26.7                 | 54.1                | 1522                            | 30.8                 | 51.3                | 1465                            | 25.2                 | 46.5                | 1465                            | 25.2                 | 46.5                | 1.00         |
| 445         | 476         | 84           | 1540                            | 33.4                 | 50.0                | 1982                            | 44.3                 | 45.5                | 1635                            | 34.2                 | 39.0                | 1635                            | 34.2                 | 39.0                | 0.89         |
| 420         | 448         | 111          | 2264                            | 35.4                 | 57.7                | 2248                            | 41.9                 | 55.0                | 2346                            | 30.9                 | 56.8                | 2346                            | 30.9                 | 56.8                | 0.94         |
| 349         | 471         | 58           | 1653                            | 31.1                 | 44.8                | 1950                            | 41.0                 | 42.1                | 1737                            | 37.5                 | 42.6                | 1737                            | 37.5                 | 42.6                | 0.90         |
| 441         | 456         | 80           | 1608                            | 31.9                 | 48.8                | 1746                            | 34.6                 | 55.6                | 1618                            | 30.2                 | 43.0                | 1618                            | 30.2                 | 43.0                | 0.93         |
| 543         | 415         | 73           | 1381                            | 29.4                 | 57.5                | 1649                            | 43.0                 | 52.3                | 1464                            | 32.9                 | 41.6                | 1464                            | 32.9                 | 41.6                | 0.90         |
| 498         | 476         | 64           | 1112                            | 30.7                 | 60.9                | 1404                            | 48.4                 | 31.7                | 1116                            | 25.6                 | 58.1                | 1116                            | 25.6                 | 58.1                | 0.94         |
| 403         | 468         | 78           | 1693                            | 30.4                 | 52.6                | 1723                            | 32.7                 | 48.7                | 1746                            | 32.0                 | 46.8                | 1746                            | 32.0                 | 46.8                | 0.95         |
| 438         | 476         | 82           | 1615                            | 31.0                 | 45.1                | 1761                            | 41.0                 | 45.7                | 1559                            | 31.1                 | 40.8                | 1559                            | 31.1                 | 40.8                | 0.93         |
| 455         | 470         | 67           | 1276                            | 27.1                 | 52.2                | 1412                            | 34.0                 | 52.0                | 1296                            | 24.2                 | 54.0                | 1296                            | 24.2                 | 54.0                | 0.99         |
| 525         | 476         | 54           | 1034                            | 26.3                 | 66.7                | 1730                            | 58.8                 | 34.7                | 1085                            | 28.6                 | 63.2                | 1085                            | 28.6                 | 63.2                | 0.97         |
| 538         | 476         | 57           | 937                             | 23.5                 | 43.9                | 1666                            | 60.9                 | 35.8                | 989                             | 27.9                 | 53.3                | 989                             | 27.9                 | 53.3                | 0.96         |
| 535         | 470         | 64           | 1050                            | 24.0                 | 73.4                | 1087                            | 42.5                 | 64.2                | 1074                            | 25.8                 | 61.9                | 1074                            | 25.8                 | 61.9                | 0.99         |
| 575         | 476         | 42           | 699                             | 18.0                 | 59.5                | 2016                            | 83.4                 | 23.4                | 708                             | 32.1                 | 50.0                | 708                             | 32.1                 | 50.0                | 0.90         |
| 638         | 533         | 55           | 677                             | 22.0                 | 56.4                | 2398                            | 63.5                 | 21.7                | 694                             | 26.9                 | 38.5                | 694                             | 26.9                 | 38.5                | 0.89         |
| 496         | 373         | 63           | 1421                            | 25.4                 | 54.0                | 1490                            | 30.4                 | 50.7                | 1493                            | 29.0                 | 51.6                | 1493                            | 29.0                 | 51.6                | 0.98         |
| 490         | 416         | 70           | 1452                            | 21.1                 | 61.4                | 1471                            | 21.7                 | 65.7                | 1441                            | 20.0                 | 61.5                | 1441                            | 20.0                 | 61.5                | 0.99         |
| 493         | 353         | 95           | 2252                            | 21.8                 | 55.8                | 2312                            | 29.9                 | 56.3                | 2209                            | 24.0                 | 57.0                | 2209                            | 24.0                 | 57.0                | 0.97         |
| 393         | 425         | 103          | 2526                            | 34.6                 | 59.2                | 2763                            | 37.8                 | 46.2                | 2625                            | 39.6                 | 37.2                | 2625                            | 39.6                 | 37.2                | 0.84         |
| 421         | 420         | 102          | 2316                            | 31.4                 | 59.8                | 2382                            | 38.6                 | 56.3                | 2371                            | 31.1                 | 56.0                | 2371                            | 31.1                 | 56.0                | 0.98         |
| 485         | 473         | 104          | 1788                            | 22.7                 | 55.8                | 1884                            | 28.7                 | 57.3                | 1816                            | 23.4                 | 53.4                | 1816                            | 23.4                 | 53.4                | 0.95         |
| 511         | 476         | 81           | 1400                            | 27.8                 | 56.8                | 1514                            | 32.1                 | 54.4                | 1404                            | 25.6                 | 53.0                | 1404                            | 25.6                 | 53.0                | 0.98         |
| 521         | 501         | 51           | 786                             | 21.6                 | 64.7                | 1912                            | 80.7                 | 27.6                | 772                             | 24.3                 | 67.4                | 772                             | 24.3                 | 67.4                | 0.93         |
| 369         | 476         | 74           | 1645                            | 32.4                 | 56.8                | 1735                            | 32.6                 | 50.0                | 1664                            | 26.7                 | 48.6                | 1664                            | 26.7                 | 48.6                | 0.89         |
| 353         | 476         | 48           | 1179                            | 27.0                 | 58.3                | 1512                            | 48.2                 | 37.3                | 1285                            | 26.7                 | 51.2                | 1285                            | 26.7                 | 51.2                | 0.94         |
| 349         | 476         | 72           | 1579                            | 35.9                 | 51.4                | 1768                            | 48.8                 | 47.9                | 1458                            | 35.2                 | 46.6                | 1458                            | 35.2                 | 46.6                | 0.83         |

(continues)

**Table S1** (continued).

| image size  |             | ground truth |                                 |                      |                     | NAVIS                           |                      |                     |                                 | proposed method      |                     |                                 |                      |                     |              |
|-------------|-------------|--------------|---------------------------------|----------------------|---------------------|---------------------------------|----------------------|---------------------|---------------------------------|----------------------|---------------------|---------------------------------|----------------------|---------------------|--------------|
| $x$<br>(px) | $y$<br>(px) | cells        | density<br>( $\text{mm}^{-2}$ ) | polymegathism<br>(%) | pleomorphism<br>(%) | density<br>( $\text{mm}^{-2}$ ) | polymegathism<br>(%) | pleomorphism<br>(%) | density<br>( $\text{mm}^{-2}$ ) | polymegathism<br>(%) | pleomorphism<br>(%) | density<br>( $\text{mm}^{-2}$ ) | polymegathism<br>(%) | pleomorphism<br>(%) | $F$ -measure |
| 433         | 516         | 63           | 1257                            | 28.4                 | 52.4                | 1787                            | 49.7                 | 28.1                | 1303                            | 32.7                 | 41.2                | 1303                            | 32.7                 | 41.2                | 0.91         |
| 520         | 476         | 53           | 863                             | 24.1                 | 62.3                | 1978                            | 81.7                 | 30.3                | 926                             | 34.8                 | 51.9                | 926                             | 34.8                 | 51.9                | 0.89         |
| 456         | 476         | 33           | 653                             | 24.9                 | 48.5                | 2108                            | 81.8                 | 22.2                | 636                             | 27.7                 | 40.0                | 636                             | 27.7                 | 40.0                | 0.83         |
| 610         | 543         | 41           | 526                             | 16.2                 | 63.4                | 2000                            | 98.9                 | 26.9                | 561                             | 32.2                 | 42.1                | 561                             | 32.2                 | 42.1                | 0.79         |
| 583         | 555         | 35           | 456                             | 23.6                 | 60.0                | 2399                            | 80.6                 | 30.8                | 530                             | 45.8                 | 39.5                | 530                             | 45.8                 | 39.5                | 0.86         |
| 763         | 525         | 39           | 554                             | 30.3                 | 43.6                | 2008                            | 74.8                 | 29.0                | 457                             | 49.5                 | 21.3                | 457                             | 49.5                 | 21.3                | 0.63         |
| 491         | 476         | 40           | 633                             | 32.5                 | 55.0                | 1836                            | 67.0                 | 28.7                | 571                             | 24.2                 | 50.0                | 571                             | 24.2                 | 50.0                | 0.86         |
| 595         | 555         | 44           | 546                             | 21.1                 | 40.9                | 2276                            | 86.3                 | 29.4                | 496                             | 56.8                 | 23.8                | 496                             | 56.8                 | 23.8                | 0.43         |
| 324         | 385         | 76           | 2404                            | 27.9                 | 55.3                | 2633                            | 35.4                 | 43.0                | 2534                            | 32.6                 | 39.2                | 2534                            | 32.6                 | 39.2                | 0.85         |
| 476         | 476         | 65           | 1216                            | 25.1                 | 52.3                | 1408                            | 37.8                 | 39.0                | 1250                            | 26.1                 | 51.5                | 1250                            | 26.1                 | 51.5                | 0.93         |
| 405         | 520         | 71           | 1335                            | 28.3                 | 62.0                | 1403                            | 33.6                 | 55.2                | 1379                            | 32.0                 | 53.6                | 1379                            | 32.0                 | 53.6                | 0.94         |
